# Supplementary material for: TSC1/2 mutations define a molecular subset of HCC with aggressive behaviour and treatment implication
Source: PubMed Central journal article supplement — Gut. 2016 Dec 14;66(8):1496–506. doi: 10.1136/gutjnl-2016-312734 (PMC5530480; doi:10.1136/gutjnl-2016-312734), 2016-12-14
Supplement: gutjnl-2016-312734supp001.pdf [file gutjnl-2016-312734supp001.pdf]

## Supplementary Materials

### ***TSC1/2* mutations define a molecular subset of HCC with aggressive behavior and treatment implication**

Daniel W. H. Ho <sup>1,2†</sup>, Lo K. Chan <sup>1,2†</sup>, Yung T. Chiu <sup>1,2</sup>, Iris M. J. Xu <sup>1,2</sup>, Ronnie T.P. Poon <sup>2,3</sup>,  
Tan T. Cheung <sup>3</sup> Chung N. Tang <sup>4</sup>, Victor W. L. Tang <sup>5</sup>, Irene L. O. Lo <sup>6</sup>, Polly W. Y. Lam <sup>7</sup>,  
Derek T. W. Yau <sup>7</sup> Miao X. Li <sup>8</sup>, Chun M. Wong <sup>1,2\*</sup>, Irene O. L. Ng <sup>1,2\*</sup>

<sup>1</sup>Department of Pathology, The University of Hong Kong

<sup>2</sup>State Key Laboratory for Liver Research, The University of Hong Kong

<sup>3</sup>Department of Surgery, The University of Hong Kong, Hong Kong

<sup>4</sup>Department of Surgery, Pamela Youde Hospital, Hong Kong

<sup>5</sup>Department of Pathology, Pamela Youde Hospital, Hong Kong

<sup>6</sup>Department of Surgery, Queen Elizabeth Hospital, Hong Kong

<sup>7</sup>Department of Pathology, Queen Elizabeth Hospital, Hong Kong,

<sup>8</sup>Department of Psychiatry and Center for Genomics Science, The University of Hong Kong

†Contributed equally to this work

\*To whom correspondence should be addressed:

Irene Oi-Lin Ng or Chun-Ming Wong, University Pathology Building, Department of Pathology, Queen Mary Hospital, Pokfulam, Hong Kong. E-mail: Irene Oi-Lin Ng (iolng@hkucc.hku.hk) or Chun-Ming Wong ([jackwong@pathology.hku.hk](mailto:jackwong@pathology.hku.hk))

## **SUPPLEMENTARY MATERIALS: TABLE OF CONTENTS**

### **Supplementary Materials and Methods**

- 1. Patient sample cohorts*
- 2. DNA and RNA extraction, library construction and next-generation sequencing (NGS)*
- 3. Bioinformatics analysis*
- 4. Coding region (CDS) screening by targeted-seq for genes in mammalian target of rapamycin (mTOR) signaling pathway*
- 5. Sanger sequencing confirmation on mutated genes in mammalian target of rapamycin (mTOR) signaling pathway*
- 6. Immunohistochemical staining for TSC1, TSC2 and phospho-S6 in human HCC samples*
- 7. Examination of the mutational status of TSC1 and TSC2 in HCC cell lines*
- 8. Colony Formation Assay*
- 9. Western blotting detection for TSC1 and TSC2*
- 10. HCC PDTX model*
- 11. Generation of stable Rheb knockdown HCC cells by shRNA*
- 12. Statistical Analysis*

### **Supplementary Figures and Tables**

**Supplementary Figure 1.** Examination of *TSC1* and 2 mutations using TCGA data.

**Supplementary Figure 2.** Sanger sequencing confirmation of the extra *TSC2* and *TSC1* mutations identified by whole exome sequencing.

**Supplementary Figure 3.** PCR amplification of specific mutant gene fragments from Genomic DNA of HCC samples (T) and their corresponding non-tumorous liver (NT) for Sanger Sequencing confirmation.

**Supplementary Figure 4.** Schematic diagram illustrating the mechanism behind the overlapping peaks being observed in direct sanger sequencing in HCC cases carrying both wildtype and mutant TSC2 with internal deletion.

**Supplementary Figure 5.** Additional IHC images showing the reduction of TSC2 expression in HCC tumor with mTOR pathway activation.

**Supplementary Figure 6.** Stable expression of shRNA against Rheb (restoration of TSC2 mimic) drastically suppressed proliferation of TSC2 mutant carrying PLC cells.

**Supplementary Table 1.** Demographic data of the patients in the sample cohorts.

**Supplementary Table 2.** List of 81 mTOR pathway-related genes.

**Supplementary Table 3.** Summary of sequencing coverage on targeted-seq.

**Supplementary Table 4.** Summary of sequencing coverage on WES.

**Supplementary Table 5.** Primers used for target gene product amplification from genomic DNA for Sanger Sequencing.

## **Supplementary Materials and Methods**

### ***1. Patient sample cohorts***

The demographic data are listed in Supplementary Table 1. The patients' ages ranged from 24 to 74 years (mean = 52.5 years) for the targeted-seq cohort and 24 to 71 years (mean = 46.4 years) for the WES cohort. Seventy-one were male patients and 24 were female for the targeted-seq cohort; Ten patients were male and 6 were female for the WES cohort

### ***2. DNA and RNA extraction, library construction and next-generation sequencing (NGS)***

Total DNA was isolated from the paired HCCs and their corresponding NTL tissues using method described previously [1]. Total RNA was extracted from HCC cell lines using Trizol reagent. Library preparation (DNA or RNA), exome capture and custom target enrichment were performed by Illumina TruSeq DNA and RNA Library Preparation and Exome Enrichment Kits and NimbleGen EZ Developer Kit, respectively, according to manufacturer's protocol. Target enriched libraries were then PCR amplified and sequenced using Illumina HiSeq2000 system. Paired-end reads of 101 b.p. were generated. Library preparation and NGS for targeted-seq and WTS were performed by Centre for Genomic Sciences, The University of Hong Kong, while those for WES were done by Axseq (Seoul, Korea). Read alignments of HCCs and their corresponding NTLs were then analyzed using VarScan (version 2.3.4) [2] to identify somatic mutations (single nucleotide variations [SNVs] and indels). VarScan made use of both HCC and their corresponding NTL data simultaneously and utilized heuristic and statistical algorithms to detect sequence variants and takes read depth, base quality, variant allele frequency and statistical significance into account. It classified variants by somatic status, and somatic sequence variants classified with high confidence were extracted for subsequent investigation. Read alignments of data for targeted-seq on HCCs and WTS on HCC cell lines were also analyzed using VarScan to

detect sequence variants, with default parameters.

Sequence variants were assigned to corresponding genes by genomic coordinates and annotated with genetic function, amino acid alteration and deleterious outcome prediction by dbNSFP [3] using ANNOVAR [4].

### **3. *Bioinformatics analysis***

Genome and transcriptomic sequencing reads were mapped to the reference human genome (hg19) using Burrows-Wheeler Aligner (BWA) (version 0.7.5a) [5] and TopHat (version 2.0.6). PCR duplicate reads were removed by PICARD (version 1.105). Alignments were refined by local realignment around insertions/deletions (indels) and base-quality score recalibration by Genome Analysis Toolkit (GATK) (version 2.8-1) [6]. To exclude potential sequence polymorphisms e.g. SNPs and irrelevant polymorphic sequences, three *in silico* filtering steps were performed as follow to exclude 1) all the potentially normal sequence variants documented in 1000 Genomes (Version 2014Oct\_ALL); 2) relatively common sequence variants with frequency  $\geq 0.001$  in Exome Sequencing Project (ESP6500\_ALL) and dbSNP (Build 138) and 3) variants without deleterious outcome predicted by any tools of dbNSFP (Version 2.3) [3].

### **4. *Coding region (CDS) screening by targeted-seq for genes in mammalian target of rapamycin (mTOR) signaling pathway***

In order to find out the mutation landscape and identify the key mutant genes for the mTOR signaling pathway, 81 mTOR pathway-related genes were selected based on KEGG pathway definition and literature search, and the CDS of them was screened for mutations by targeted-seq using a cohort of 95 cases. Assay design was provided by NimbleGen, following manufacturer's protocol.

#### **5. Sanger sequencing confirmation on mutated genes in mammalian target of rapamycin (mTOR) signaling pathway**

Sequencing primers were designed to confirm somatic mutations identified on genes in mTOR signaling pathway and were listed in Supplementary Table 5. We amplified genomic intervals containing the mutations by PCR. Products were sequenced using BigDye Terminator Cycle Sequencing Kit (Life Technologies) and detected on ABI 3730xl sequencers. Confirmation was performed on pairs of HCC and corresponding NTL genomic DNA samples to verify the somatic mutations detected by NGS strategies.

#### **6. Immunohistochemical staining for TSC1, TSC2 and phospho-S6 in human HCC samples**

Immunohistochemistry was performed on formalin-fixed, paraffin-embedded (FFPE) sections, as described [7], using anti-TSC1 (#6935, 1:250), anti-TSC2 (#4308, 1:250), anti-phospho-S6 Ser235/6 (#4858, 1:25) and anti-phospho-S6 Ser240/4 (#5364, 1:250) rabbit monoclonal antibodies (Cell Signaling Technology, Beverly, CA).

#### **7. Examination of the mutational status of TSC1 and TSC2 in HCC cell lines**

Complementary to the mutation screening in human HCCs, *TSC1* and *TSC2* were screened for mutations in 7 HCC cell lines (BEL7402, HepG2, Hep3B, Huh7, MHCC97L, PLC and SMMC) using WTS. Non-synonymous coding and splice site mutations were extracted. Coding region (CDS) of *TSC1* and *TSC2* were examined for similar mutations by Sanger sequencing in H2P and H2M cell lines.

#### **8. Colony Formation Assay**

HCC cells were seeded onto 24-well plates at a density of  $2.5 \times 10^4$  cells per well and subjected to Rapamycin treatment for 4 days at 1, 10 and 100 nM. The cells were fixed with 4% formaldehyde and visualized by crystal violet staining.

#### **9. Western blotting detection for TSC1 and TSC2**

Cell culture in 12-well format was washed once with PBS and subjected to the direct SDS-lysis with 60ul standard Laemmli sample buffer with DTT. The whole cell lysate were boiled for 10 minutes. One-tenth of the cell lysate was subjected to 10% SDS-PAGE analysis. Immunoblotting was performed with the use of anti-TSC1 antibody (1:1000 Cell Signaling Technology, Beverly, CA), anti-TSC2 antibody (1:1000 Abcam, Cambridge, MA, USA) in 4% BSA/TBST. Anti- $\beta$ -actin antibody (1:5000, Sigma, St. Louis, MO) in 4% milk/TBST was used as normalization control.

#### **10. HCC PDTX model**

To dissociate PDTX HCC tumor, tumor was removed from mice and diced into pieces of  $1\text{mm}^3$  size in ice cold DMEM/F-12 medium with a surgical blade. The diced tumor was homogenized twice in C tube using the human tumor program in a gentleMACS dissociator (Miltenyi Biotec, Auburn, CA) with the presence of DNAase and Liberase (Roche), followed by 37°C incubation in water bath for 5 minutes. The homogenization steps were repeated for two times to ensure complete tumor dissociation. The dissociated samples were subjected to pass through a sterile 100uM nylon cell strainer to remove any unwanted debris. The tumor cells were collected and separated from the blood cells from the flow-through by centrifugation at 2,700rpm for 3 minutes. The cell viability of the dissociated tumor cells was assessed by trypan blue staining using a hemocytometer. To ensure sufficient dissociated cells for subsequent subcutaneous injection, at least 10 tumors from the same PDTX being grown

for a duration of 4-6 weeks in five mice were harvested for tumor dissociation at the same time. At least  $1 \times 10^6$  viable, unsorted tumor cells were re-suspended in 100ul 1:1 DMEM/F-12 Matrigel mix (v/v) and subcutaneously injected into 4-6 weeks aged, immune-deficient *BALB/c nude* mice followed by a period of 2-4 weeks incubation. When the diameter of the tumor reached 5mm, Rapamycin (LC laboratories, Woburn, MA) was given by daily intraperitoneal injection at the indicated concentrations for 2-4 weeks, depending on the proliferation rate with respect to the vehicle-treated tumor. Sterile 5% Tween80 (Anatrace, Maumee, OH) / 5% PEG400 (USB-Affymetrix, Inc., USA) in water was used as the injection vehicle. The body weight and the size of the tumor were monitored and measured throughout the treatment. The tumor mass (g) of the harvested tumor was measured at the end-point of the experiment. The tumor volume in  $\text{mm}^3$  was calculated by the following formula:  $1/2 \times \text{Length (mm)} \times \text{Width (mm)} \times \text{Depth (mm)}$ . Animal experiment was approved by the Committee on the Use of Live Animals in Teaching and Research (CULATR 4035-16), Li Ka Shing Faculty of Medicine, University of Hong Kong.

### ***11. Generation of stable Rheb knockdown HCC cells by shRNA***

pLK0.1-Puro based lentiviral shRNA expression vector carrying specific Rheb targeting sequence (shRheb#25: TTATGTTGGTTGGGAATAAGA and shRheb#99: CCTATTATGTTGGTTGGGAAT) and non-targeted control (shNTC) were transfected into 293FT packaging cells to produce viral containing supernatant for subsequent HCC cells viral transduction. SMMC and PLC cells were seed on 6-well plate at a density of  $8 \times 10^4$  cells per well and incubated with lentiviral supernatant of shNTC, shRheb#25 and shRheb#99 for 24 hours in the presence of 8ug/ml Polybrene (Sigma, St. Louis, MO). The transduced cells were then re-plated on 10cm plate and selected in the presence of puromycin at 0.5ug/ml (SMMC) and 0.9ug/ml (PLC) for 4 Days. To confirm the Rheb knockdown efficiency in SMMC cells,



cell lysates were prepared and subjected to immunoblotting against Rheb specific antibody (1:1000, Cell Signaling Technology).

## 12. Statistical Analysis

Contingency table was tested using Fisher's exact test. Quantitative comparison between groups was done by Student *t* test. All tests were computed as 2-tailed and a *P* value < 0.05 was considered statistical significant.

### Supplementary Figure Legends

**Supplementary Figure 1.** Examination of *TSC1* and 2 mutations using TCGA data. (A) mTOR pathway-related mutant genes in TCGA HCC dataset. (B) Frequencies of *TSC1* and 2 mutations in TCGA cancer panel.

**Supplementary Figure 2.** Sanger sequencing confirmation of the two additional *TSC2* and *TSC1* mutations identified by whole exome sequencing in the WES cohort.

**Supplementary Figure 3.** PCR amplification of specific mutant gene fragments from genomic DNA of HCC samples (T) and their corresponding non-tumorous livers (NT) for Sanger sequencing confirmation. (A) *TSC2* mutants and (B) *TSC1* mutants identified in the Targeted-seq cohort.

**Supplementary Figure 4.** Schematic diagram illustrating the mechanism behind the overlapping peaks observed in direct Sanger sequencing in HCC cases carrying both wildtype and mutant *TSC2* with internal deletion. (A) Case 265T and 354T carried AGG deletion at 4025-4027 nucleotide position in *TSC2* Exon34, which resulted in a frameshift when compared to the wildtype *TSC2*. (B) Case 311T carried AGA deletion at 4653-4655 nucleotide position in *TSC2* Exon28, which also resulted in a frameshift when compared to the wildtype *TSC2*.

**Supplementary Figure 5.** IHC staining in additional HCC cases showing the reduction of TSC2 expression in the tumors with mTOR pathway activation. (A) HCC tumor carrying non-sense TSC2 mutation (TSC2 Q1377X, Case 533T). (B) HCC tumor carrying non-synonymous TSC2 mutation (TSC2 T1071R, Case 235T). NT: Non-tumorous liver.

**Supplementary Figure 6.** Stable expression of shRNA against Rheb (restoration of TSC2 mimic) drastically suppressed proliferation of *TSC2* mutant-carrying PLC cells. (A) Brightfield images showing the number of shRNA expressing puromycin resistant cells obtained 4 days after selection. Non-viral transduced cells subjected to puromycin treatment served as a negative control. (B) Table summarizing the shRheb stable cells obtained after puromycin selection. (C) The efficiency of Rheb knockdown in SMMC shclone#25 and #99 was confirmed by western blotting using Rheb specific antibodies. (D) The mutational status of *TSC* complex would predict the Rheb dependency as well as the Rapamycin sensitivity in HCC cells.

### Supplementary References

- 1 Wong CM, Lee JM, Ching YP, Jin DY, Ng IO. Genetic and epigenetic alterations of DLC-1 gene in hepatocellular carcinoma. *Cancer Res* 2003;**63**:7646-51.
- 2 Koboldt DC, Zhang Q, Larson DE, Shen D, McLellan MD, Lin L, *et al.* VarScan 2: somatic mutation and copy number alteration discovery in cancer by exome sequencing. *Genome Res* 2012;**22**:568-76.
- 3 Liu X, Jian X, Boerwinkle E. dbNSFP v2.0: a database of human non-synonymous SNVs and their functional predictions and annotations. *Hum Mutat* 2013;**34**:E2393-402.
- 4 Wang K, Li M, Hakonarson H. ANNOVAR: functional annotation of genetic variants from high-throughput sequencing data. *Nucleic Acids Res* 2010;**38**:e164.
- 5 Li H, Durbin R. Fast and accurate short read alignment with Burrows-Wheeler transform. *Bioinformatics* 2009;**25**:1754-60.
- 6 McKenna A, Hanna M, Banks E, Sivachenko A, Cibulskis K, Kernytsky A, *et al.* The Genome Analysis Toolkit: a MapReduce framework for analyzing next-generation DNA sequencing data. *Genome Res* 2010;**20**:1297-303.
- 7 Wong CM, Fan ST, Ng IO. beta-Catenin mutation and overexpression in hepatocellular carcinoma: clinicopathologic and prognostic significance. *Cancer* 2001;**92**:136-45.

# Supplementary Figure 1

A

HCC cases with mutant mTOR genes in TCGA (n=120)

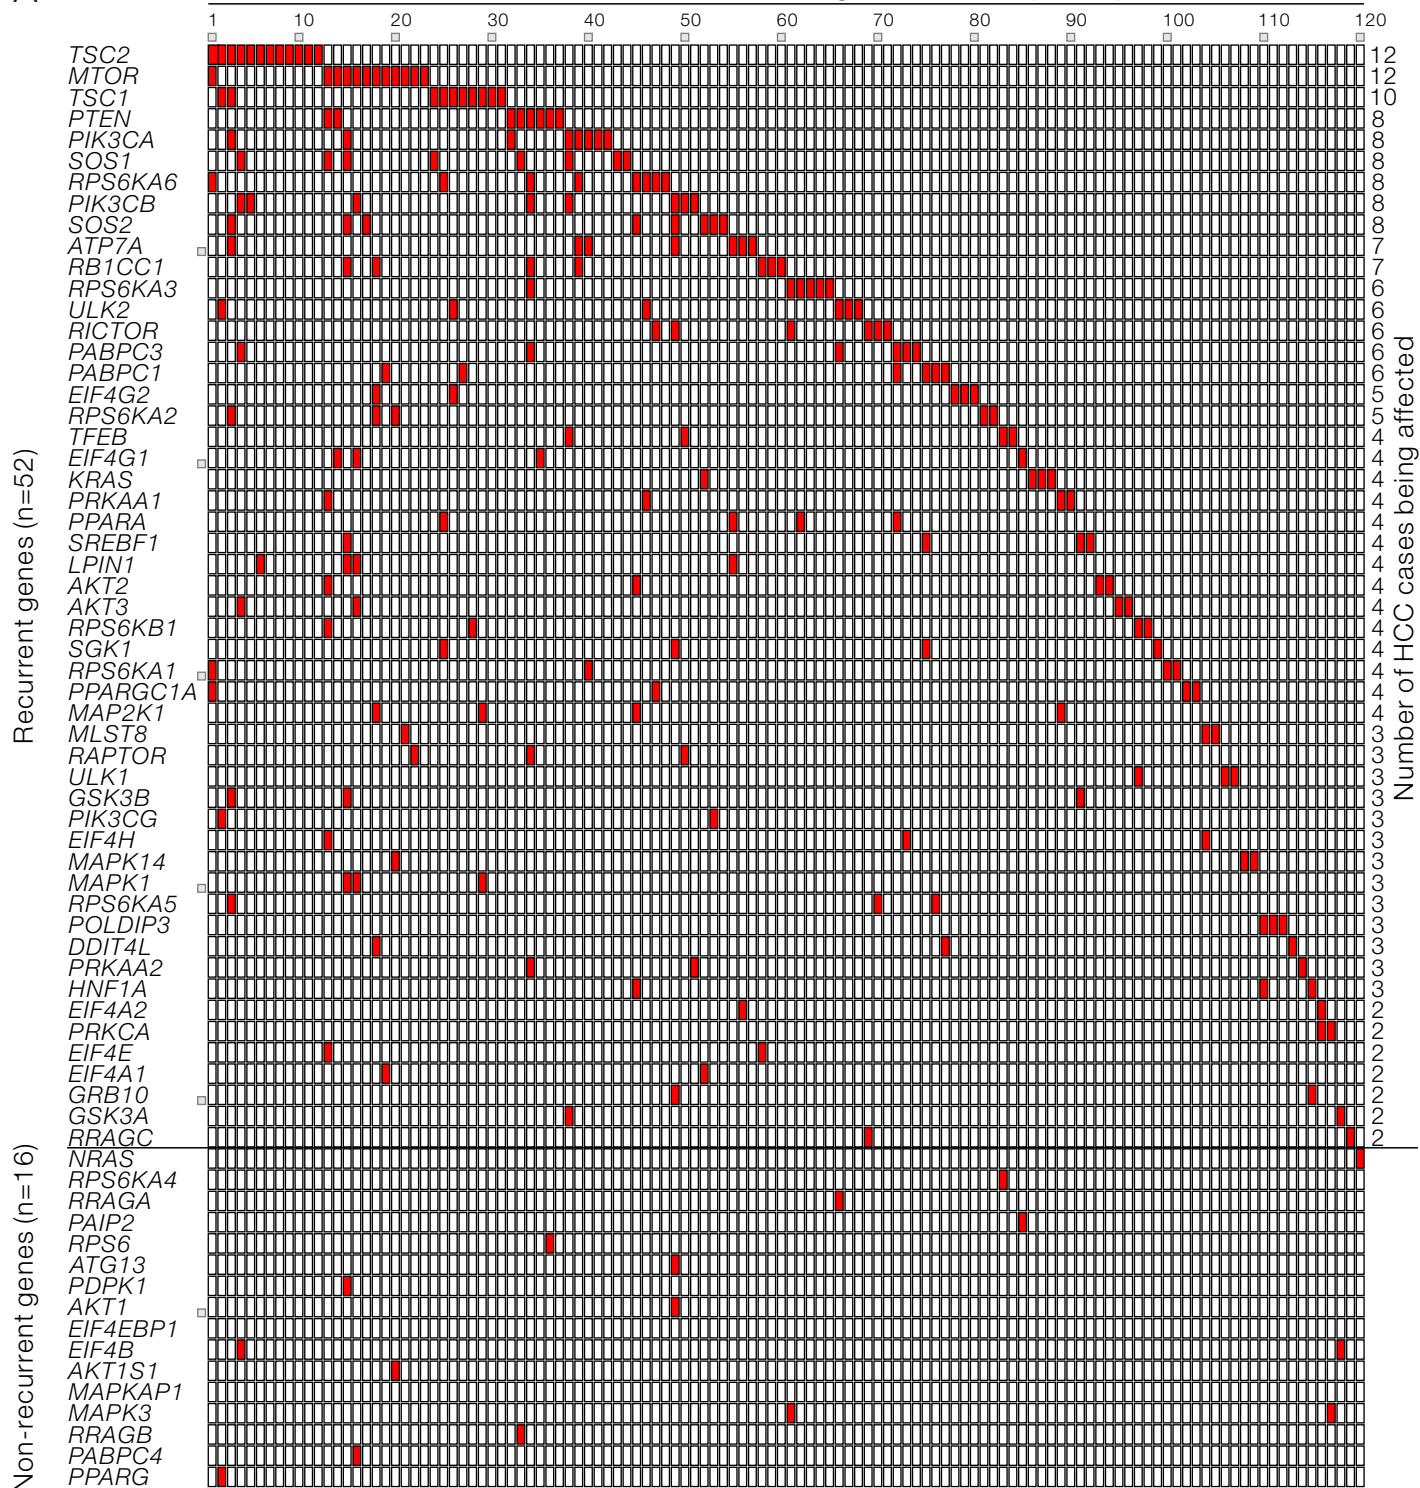

B

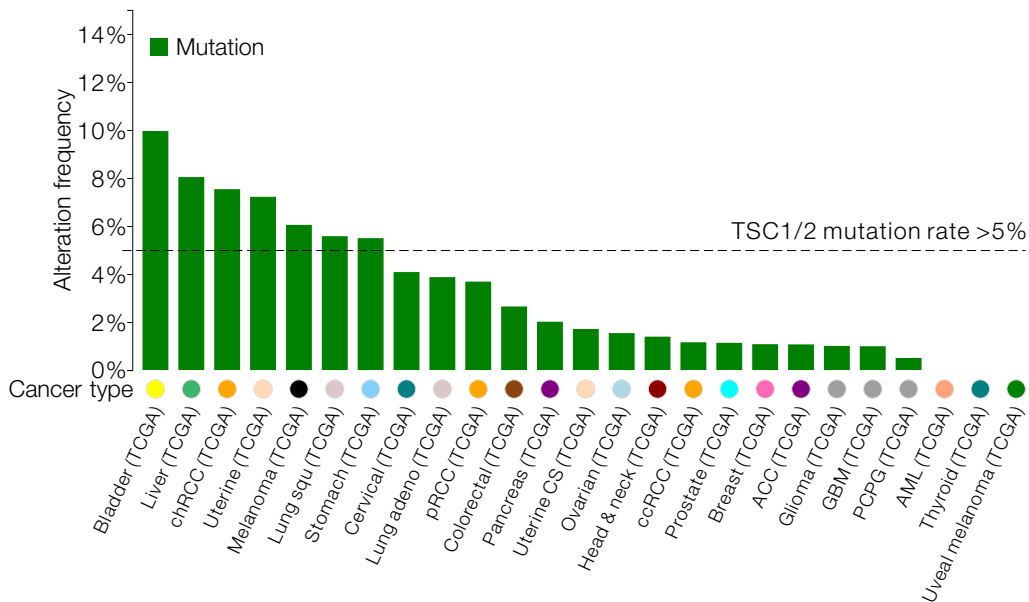

## Supplementary Figure 2

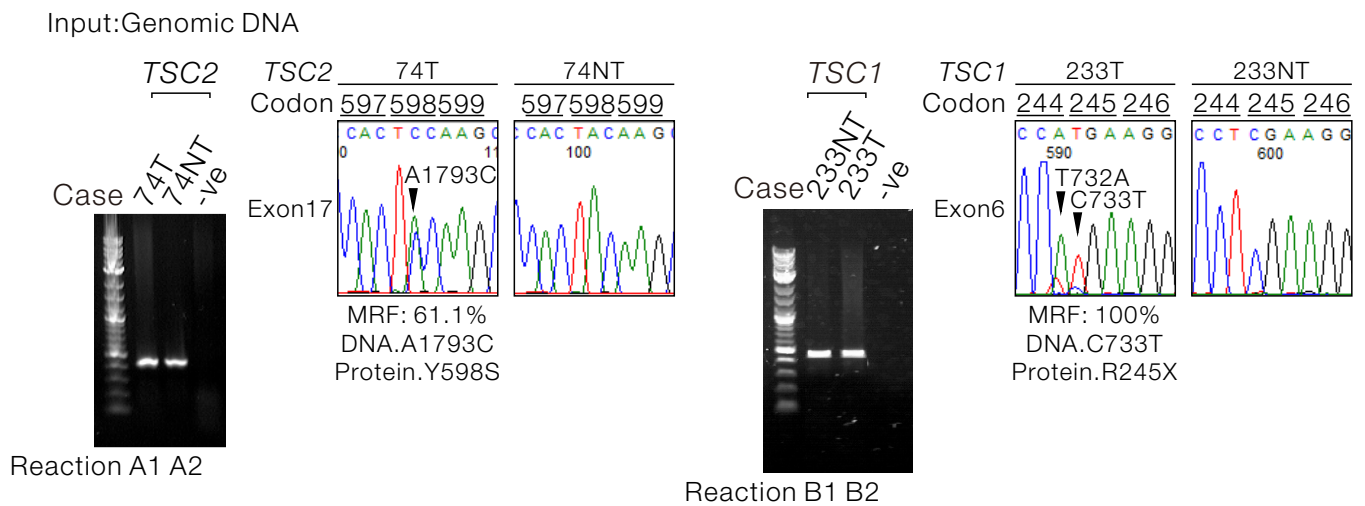

## Supplementary Figure 3

**A** Input: Genomic DNA

Case 208T 235T 265T 301T 331T 341T 354T 366T 374T 383T PY003T  
 TSC2 Exon 30 28 11 34 19 36 8 8 34 6 21 21 34 3<sup>-ve</sup>

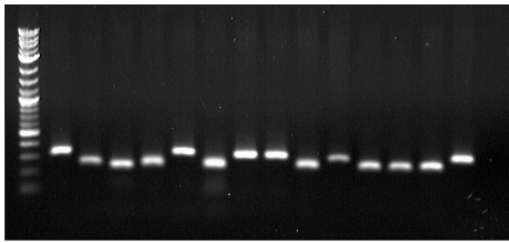

Reaction A 1 2 3 4 5 6 7 8 9 10 11 12 13 14

Case 208NT 235NT 265NT 301NT 331NT 341NT 354NT 366NT 374NT 383NT PY003NT  
 TSC2 Exon 30 28 11 34 19 36 8 8 34 6 21 21 34 3<sup>-ve</sup>

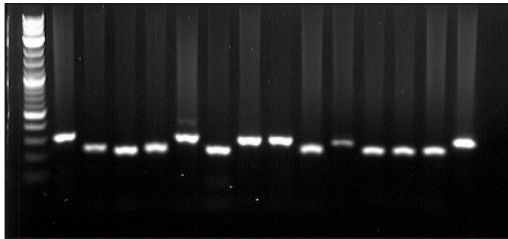

Reaction B 1 2 3 4 5 6 7 8 9 10 11 12 13 14

**B** Input: Genomic DNA

Case 219T 237T 272T 340T 368T  
 TSC1 Exon 10 18 13 17 23<sup>-ve</sup>

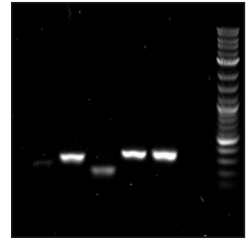

Reaction C 1 2 3 4 5

Case 219NT 237NT 272NT 340NT 368NT  
 TSC1 Exon 10 18 13 17 23<sup>-ve</sup>

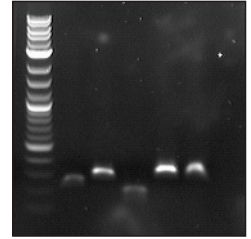

Reaction D 1 2 3 4 5

Long exposure

## Supplementary Figure 4

### A Case 265T (MRF=39.4%) and Case 354T (MRF=23.3%)

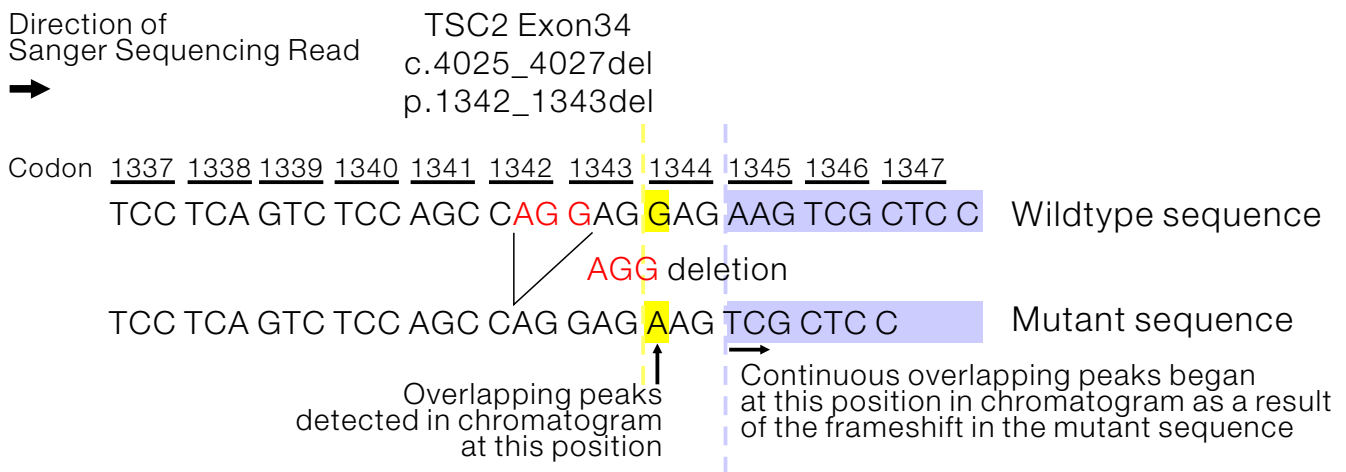

### B Case 331T (MRF=57.1%)

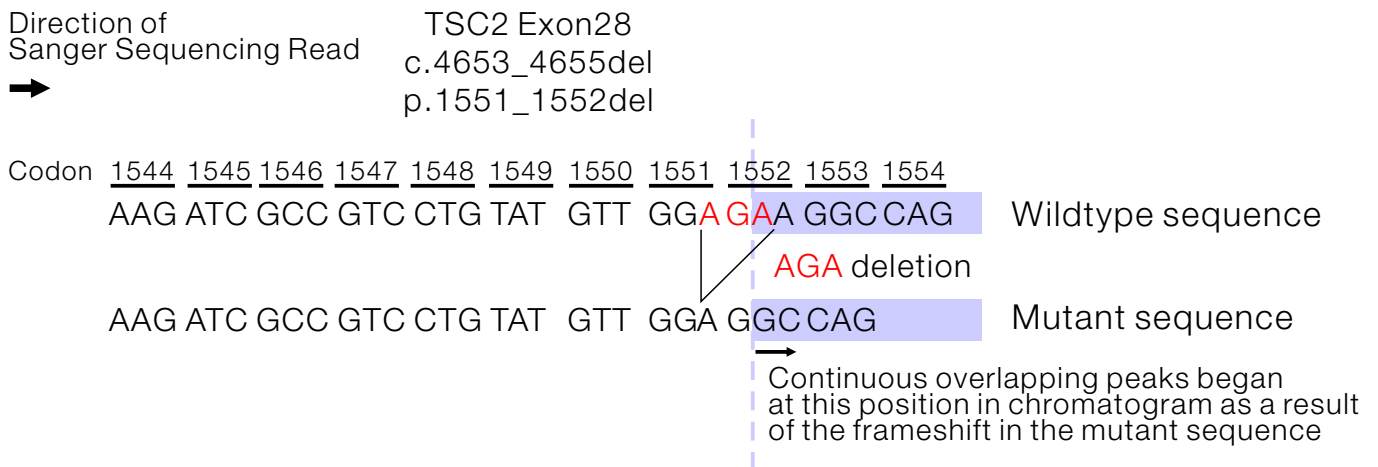



# Supplementary Figure 5

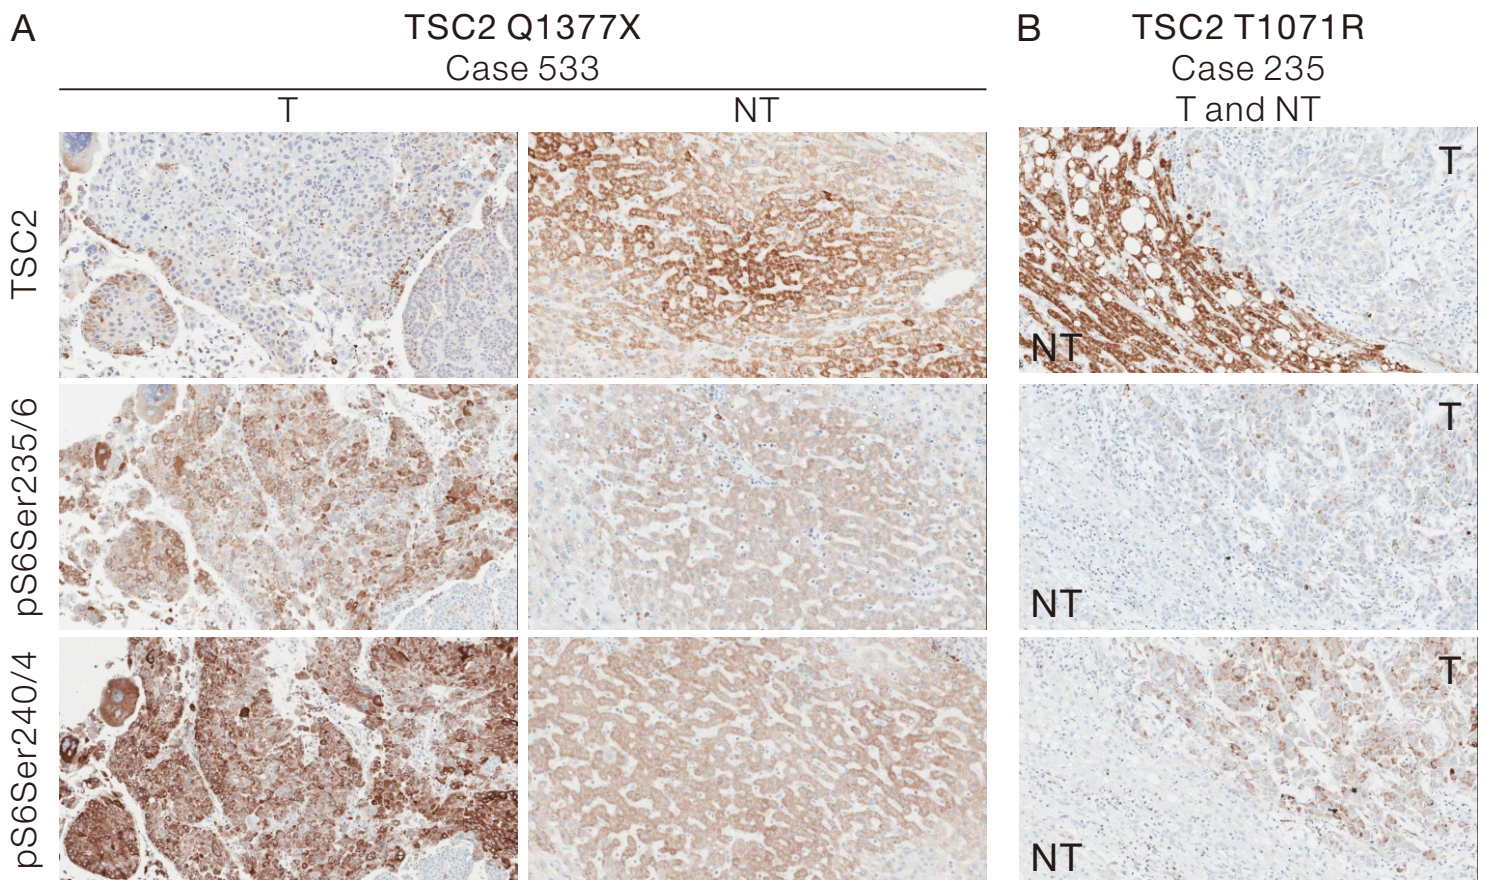

# Supplementary Figure 6

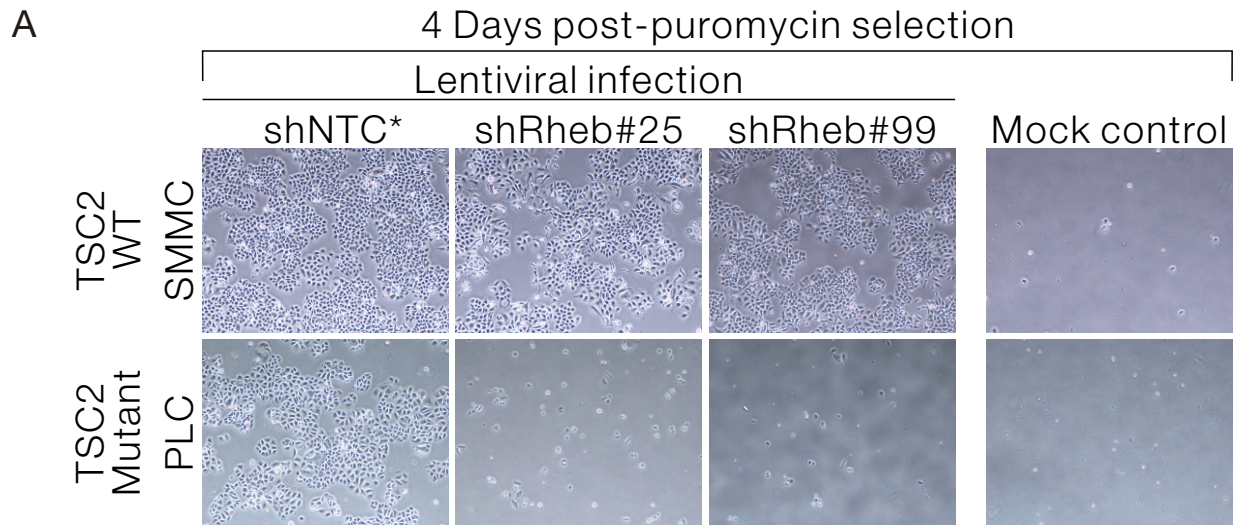

\*Non-targeted control

**B** Generation of puromycin resistant shRheb stable cells

|                 | shNTC | shRheb#25 | shRheb#99 |
|-----------------|-------|-----------|-----------|
| TSC2 WT SMMC    | Yes   | Yes       | Yes       |
| TSC2 Mutant PLC | Yes   | No        | No        |

**C** Western blot

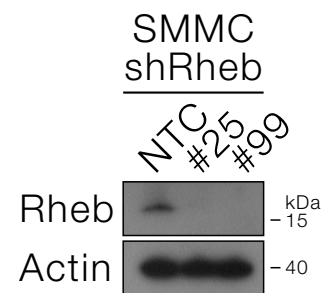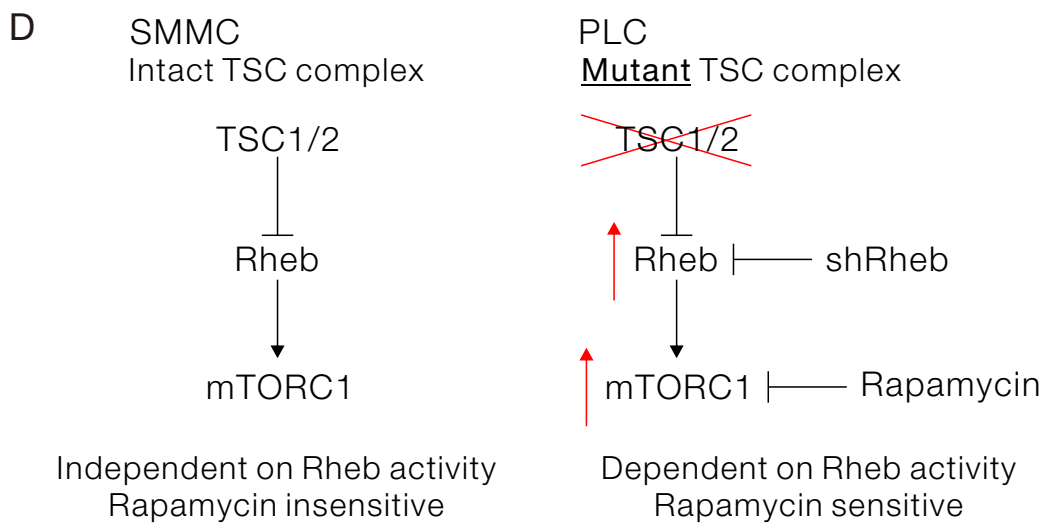



## Supplementary Table 1

### Demographic data of the patients in the sample cohorts

| Parameters                            | Sample cohort         |         |              |         |
|---------------------------------------|-----------------------|---------|--------------|---------|
|                                       | Targeted-seq (n = 95) |         | WES (n = 16) |         |
| <b>Gender</b>                         |                       |         |              |         |
| Male                                  | 71                    | (74.7%) | 10           | (62.5%) |
| Female                                | 24                    | (25.3%) | 6            | (37.5%) |
| Mean age (range)                      | 52.5                  | (24-74) | 46.4         | (24-71) |
| Average tumor size (range, in cm)     | 7.8                   | (2-27)  | 7.8          | (1-18)  |
| <b>Background liver disease</b>       |                       |         |              |         |
| Normal                                | 1                     | (1.1%)  | 2            | (12.5%) |
| Chronic hepatitis                     | 42                    | (44.2%) | 5            | (31.3%) |
| Cirrhosis                             | 52                    | (54.7%) | 9            | (56.3%) |
| <b>Liver invasion</b>                 |                       |         |              |         |
| Yes                                   | 32                    | (33.7%) | 5            | (31.3%) |
| No                                    | 58                    | (61.1%) | 11           | (68.8%) |
| <b>Tumor microsatellite formation</b> |                       |         |              |         |
| Yes                                   | 51                    | (53.7%) | 7            | (43.8%) |
| No                                    | 41                    | (43.2%) | 9            | (56.3%) |
| <b>Tumor encapsulation</b>            |                       |         |              |         |
| Yes                                   | 31                    | (32.6%) | 7            | (43.8%) |
| No                                    | 62                    | (65.3%) | 8            | (50%)   |
| <b>Venous invasion</b>                |                       |         |              |         |
| Yes                                   | 54                    | (56.8%) | 8            | (50%)   |
| No                                    | 41                    | (43.2%) | 8            | (50%)   |
| <b>Cellular differentiation</b>       |                       |         |              |         |
| Edmondson grade I-II                  | 35                    | (36.8%) | 6            | (37.5%) |
| Edmondson grade III-IV                | 60                    | (63.2%) | 10           | (62.5%) |
| <b>TNM staging</b>                    |                       |         |              |         |
| I-II                                  | 35                    | (36.8%) | 7            | (43.8%) |
| III-IV                                | 60                    | (63.2%) | 9            | (56.3%) |

## Supplementary Table 2

### List of 81 mTOR pathway-related genes

|          |          |
|----------|----------|
| AKT1     | PDCD4    |
| AKT1S1   | PDPK1    |
| AKT2     | PIK3CA   |
| AKT3     | PIK3CB   |
| ATG13    | PIK3CG   |
| ATP7A    | POLDIP3  |
| DDIT4    | PPARA    |
| DDIT4L   | PPARG    |
| DEPTOR   | PPARGC1A |
| EIF4A1   | PRKAA1   |
| EIF4A2   | PRKAA2   |
| EIF4B    | PRKCA    |
| EIF4E    | PRR5     |
| EIF4EBP1 | PTEN     |
| EIF4G1   | RB1CC1   |
| EIF4G2   | RHEB     |
| EIF4H    | RICTOR   |
| FKBP1A   | RPS6     |
| GRB10    | RPS6KA1  |
| GRB2     | RPS6KA2  |
| GSK3A    | RPS6KA3  |
| GSK3B    | RPS6KA4  |
| HIF1A    | RPS6KA5  |
| HRAS     | RPS6KA6  |
| IRS1     | RPS6KB1  |
| KRAS     | RPTOR    |
| LAMTOR1  | RRAGA    |
| LPIN1    | RRAGB    |
| MAP2K1   | RRAGC    |
| MAPK1    | RRAGD    |
| MAPK14   | SGK1     |
| MAPK3    | SOS1     |
| MAPKAP1  | SOS2     |
| MLST8    | SREBF1   |
| MTOR     | STK11    |
| NRAS     | TFEB     |
| PABPC1   | TSC1     |
| PABPC3   | TSC2     |
| PABPC4   | ULK1     |
| PAIP1    | ULK2     |
| PAIP2    |          |

### Supplementary Table 3

#### Summary of sequencing coverage on targeted-seq

| <b>Target size (bases) = 7,189,881</b> | <b># of on-target bases</b> | <b>On-target coverage (fold)</b> |
|----------------------------------------|-----------------------------|----------------------------------|
| 104T                                   | 1,057,460,773               | 147.1                            |
| 106T                                   | 1,104,749,719               | 153.7                            |
| 200T                                   | 1,090,198,693               | 151.6                            |
| 202T                                   | 1,126,325,055               | 156.7                            |
| 203T                                   | 1,106,868,289               | 153.9                            |
| 206T                                   | 1,182,342,058               | 164.4                            |
| 208T                                   | 1,172,456,768               | 163.1                            |
| 211T                                   | 1,240,909,028               | 172.6                            |
| 214T                                   | 1,121,770,033               | 156.0                            |
| 216T                                   | 1,000,621,815               | 139.2                            |
| 217T                                   | 1,066,796,971               | 148.4                            |
| 218T                                   | 999,588,418                 | 139.0                            |
| 219T                                   | 997,220,384                 | 138.7                            |
| 220T                                   | 1,077,355,527               | 149.8                            |
| 221T                                   | 1,079,559,605               | 150.1                            |
| 222T                                   | 1,065,753,064               | 148.2                            |
| 225T                                   | 1,021,923,369               | 142.1                            |
| 232T                                   | 978,589,971                 | 136.1                            |
| 235T                                   | 1,048,056,271               | 145.8                            |
| 236T                                   | 1,176,716,745               | 163.7                            |
| 237T                                   | 1,047,504,602               | 145.7                            |
| 238T                                   | 1,092,248,775               | 151.9                            |
| 239T                                   | 1,110,787,921               | 154.5                            |
| 240T                                   | 1,086,687,423               | 151.1                            |
| 244T                                   | 1,073,061,585               | 149.2                            |
| 246T                                   | 1,099,436,650               | 152.9                            |
| 248T                                   | 1,177,440,956               | 163.8                            |
| 249T                                   | 1,139,260,009               | 158.5                            |
| 250T                                   | 1,016,757,870               | 141.4                            |
| 253T                                   | 1,020,449,217               | 141.9                            |
| 255T                                   | 1,124,081,348               | 156.3                            |
| 256T                                   | 1,081,201,421               | 150.4                            |
| 257T                                   | 1,104,019,987               | 153.6                            |

|      |               |       |
|------|---------------|-------|
| 258T | 1,065,077,622 | 148.1 |
| 259T | 1,081,646,569 | 150.4 |
| 261T | 1,024,775,247 | 142.5 |
| 265T | 1,078,639,848 | 150.0 |
| 266T | 1,045,141,385 | 145.4 |
| 269T | 1,142,517,128 | 158.9 |
| 270T | 1,175,326,979 | 163.5 |
| 271T | 1,327,206,044 | 184.6 |
| 272T | 1,200,486,419 | 167.0 |
| 297T | 1,273,271,461 | 177.1 |
| 301T | 1,417,083,876 | 197.1 |
| 302T | 1,218,667,703 | 169.5 |
| 303T | 1,151,192,513 | 160.1 |
| 305T | 1,204,282,088 | 167.5 |
| 311T | 1,105,199,798 | 153.7 |
| 312T | 1,038,857,169 | 144.5 |
| 316T | 977,119,463   | 135.9 |
| 326T | 1,027,652,067 | 142.9 |
| 329T | 1,003,752,997 | 139.6 |
| 330T | 1,140,639,204 | 158.6 |
| 331T | 1,031,922,231 | 143.5 |
| 334T | 1,016,112,289 | 141.3 |
| 335T | 1,029,206,521 | 143.1 |
| 336T | 992,523,151   | 138.0 |
| 340T | 1,085,164,623 | 150.9 |
| 341T | 991,738,403   | 137.9 |
| 342T | 1,128,056,851 | 156.9 |
| 343T | 1,155,316,247 | 160.7 |
| 346T | 1,016,521,219 | 141.4 |
| 348T | 1,091,123,016 | 151.8 |
| 350T | 1,280,197,796 | 178.1 |
| 351T | 1,081,874,381 | 150.5 |
| 352T | 1,210,162,705 | 168.3 |
| 354T | 1,134,830,011 | 157.8 |
| 356T | 1,138,368,033 | 158.3 |
| 361T | 1,154,592,134 | 160.6 |
| 362T | 1,142,323,069 | 158.9 |
| 363T | 1,056,011,340 | 146.9 |

|        |               |              |
|--------|---------------|--------------|
| 364T   | 1,049,555,575 | 146.0        |
| 365T   | 1,077,812,051 | 149.9        |
| 366T   | 979,487,849   | 136.2        |
| 367T   | 1,091,104,870 | 151.8        |
| 368T   | 1,100,781,875 | 153.1        |
| 370T   | 1,063,422,461 | 147.9        |
| 372T   | 1,180,054,021 | 164.1        |
| 373T   | 1,140,040,632 | 158.6        |
| 374T   | 1,088,166,496 | 151.3        |
| 376T   | 1,144,312,194 | 159.2        |
| 377T   | 1,159,247,209 | 161.2        |
| 378T   | 1,097,494,842 | 152.6        |
| 379T   | 1,256,255,503 | 174.7        |
| 528T   | 1,127,149,154 | 156.8        |
| 533T   | 1,206,178,923 | 167.8        |
| 541T   | 1,113,054,750 | 154.8        |
| 555T   | 1,194,899,542 | 166.2        |
| 570T   | 1,203,634,750 | 167.4        |
| 589T   | 1,025,161,419 | 142.6        |
| 89T    | 1,084,894,765 | 150.9        |
| 95T    | 1,159,123,294 | 161.2        |
| PY003T | 1,212,016,182 | 168.6        |
| QE022T | 1,128,179,044 | 156.9        |
| QM007T | 1,159,981,971 | 161.3        |
|        | <b>Mean</b>   | <b>154.3</b> |

## Supplementary Table 4

### Summary of sequencing coverage on WES

| <b>Exome size (bases) = 62,085,286</b> | <b># of on-target bases</b> | <b>On-target coverage (fold)</b> |
|----------------------------------------|-----------------------------|----------------------------------|
| 74NT                                   | 2,031,897,016               | 32.7                             |
| 74T                                    | 2,178,992,952               | 35.1                             |
| 251NT                                  | 3,133,474,018               | 50.5                             |
| 251T                                   | 2,051,619,346               | 33.0                             |
| 254NT                                  | 2,429,346,837               | 39.1                             |
| 254T                                   | 1,778,169,960               | 28.6                             |
| 308NT                                  | 2,814,903,309               | 45.3                             |
| 308T                                   | 1,780,598,821               | 28.7                             |
| 315NT                                  | 2,220,563,651               | 35.8                             |
| 315T                                   | 1,906,774,393               | 30.7                             |
| 383NT                                  | 2,215,235,838               | 35.7                             |
| 383T                                   | 2,074,175,142               | 33.4                             |
| 84NT                                   | 2,070,195,337               | 33.3                             |
| 84T                                    | 2,472,701,279               | 39.8                             |
| 105NT                                  | 3,638,732,506               | 58.6                             |
| 105T                                   | 4,717,055,256               | 76.0                             |
| 107NT                                  | 3,464,698,327               | 55.8                             |
| 107T                                   | 3,627,611,395               | 58.4                             |
| 133NT                                  | 1,967,457,650               | 31.7                             |
| 133T                                   | 2,508,876,928               | 40.4                             |
| 151NT                                  | 2,686,184,039               | 43.3                             |
| 151T                                   | 2,178,664,486               | 35.1                             |
| 228NT                                  | 3,397,280,592               | 54.7                             |
| 228T                                   | 2,818,288,111               | 45.4                             |
| 233NT                                  | 3,255,493,788               | 52.4                             |
| 233T                                   | 2,539,196,032               | 40.9                             |
| 149NT                                  | 2,781,697,840               | 44.8                             |
| 149T                                   | 3,650,920,765               | 58.8                             |
| 229NT                                  | 4,252,615,373               | 68.5                             |
| 229T                                   | 3,583,214,645               | 57.7                             |
| 234NT                                  | 3,892,739,437               | 62.7                             |
| 234T                                   | 3,843,638,664               | 61.9                             |
|                                        | <b>Mean</b>                 | <b>45.3</b>                      |

Supplementary Table 5

Primers used for target gene product amplification from genomic DNA for Sanger Sequencing

| Reaction index                    | Target gene/<br>HCC Case                      | PCR primer | Primer sequence (5'>3')  | Product size (bp) |
|-----------------------------------|-----------------------------------------------|------------|--------------------------|-------------------|
| A1, A2                            | <i>TSC2</i> /<br>74T/NT                       | Forward    | GACTGCGTTTTACCTCCTG      | 415               |
|                                   |                                               | Reverse    | GTCCTTTTCTCTGCCCAAC      |                   |
| B1, B2                            | <i>TSC1</i> /<br>233T/NT                      | Forward    | GCTGTATGAGTGCTTCCAAG     | 486               |
|                                   |                                               | Reverse    | TTCTTCCTCGCCACTCCAAT     |                   |
| C1, D1                            | <i>TSC2</i> /<br>208T/NT                      | Forward    | CGGGGGGAGCATT CAGCTTGA   | 324               |
|                                   |                                               | Reverse    | AAGATGGCGCTCAGGCCAG      |                   |
| C2, D2                            | <i>TSC2</i> /<br>235T/NT                      | Forward    | ACGGGCAAGCTGGGTTTC       | 245               |
|                                   |                                               | Reverse    | CTCGGGACAGCCGGTGTC       |                   |
| C3, D3                            | <i>TSC2</i> /<br>265T/NT                      | Forward    | TGCTGGCCGGGCTCGTGT       | 225               |
|                                   |                                               | Reverse    | GGCCGAGCCTGCCTGTCTG      |                   |
| C4, C9,<br>C13,<br>D4, D9,<br>D13 | <i>TSC2</i> /<br>265T/NT, 354T/NT,<br>533T/NT | Forward    | TGCCTGCTGACAGGGGTTTC     | 240               |
|                                   |                                               | Reverse    | CAGGGTCCCCGAGGATGTC      |                   |
| C5, D5                            | <i>TSC2</i> /<br>330T/NT                      | Forward    | GTGGCGCTGTTTGCATGTC      | 322               |
|                                   |                                               | Reverse    | GGTGGCAGCTCCCTGTCC       |                   |
| C6, D6                            | <i>TSC2</i> /<br>331T/NT                      | Forward    | GGGGCTCAGGCAGGGCTCT      | 233               |
|                                   |                                               | Reverse    | CCCGGCAGTGTGAGCTCTG      |                   |
| C7, C8,<br>D7, D8                 | <i>TSC2</i> /<br>340T/NT, 341T/NT             | Forward    | CCATGGCAGCGGGGAGAGGT     | 305               |
|                                   |                                               | Reverse    | GGCCCTTGTCCCATCCATGT     |                   |
| C10, D10                          | <i>TSC2</i> /<br>366T/NT                      | Forward    | GGAGGTGAGTGGGAGATGTAG    | 292               |
|                                   |                                               | Reverse    | GGCGTGAGCCATTGTG         |                   |
| C11, C12,<br>D11, D12             | <i>TSC2</i> /<br>374T/NT                      | Forward    | CCTCTGGCTACCCCGTGAC      | 236               |
|                                   |                                               | Reverse    | GGCCCCATCAAGCTCGC        |                   |
| C14, D14                          | <i>TSC2</i> /<br>PY003T/NT                    | Forward    | TGGAAAATGCAGTGGGAGTCTTTA | 296               |
|                                   |                                               | Reverse    | GCAAACCAGATCATCGGCAGTCAG |                   |
| E1, F1                            | <i>TSC1</i> /<br>219T/NT                      | Forward    | CACACTAACCCCTGTGTTC      | 238               |
|                                   |                                               | Reverse    | TTCCAACACATACTAAATCT     |                   |
| E2, F2                            | <i>TSC1</i> /<br>237T/NT                      | Forward    | CCTGTGTTGGAAGACAGCTAA    | 303               |
|                                   |                                               | Reverse    | ACTGCTCTCCGGCATTCTC      |                   |
| E3, F3                            | <i>TSC1</i> /<br>272T/NT                      | Forward    | CAACATTTTTCGTCTTGTGA     | 170               |
|                                   |                                               | Reverse    | ACATATAACCCAATTAGAAGAGG  |                   |
| E4, F4                            | <i>TSC1</i> /<br>340T/NT                      | Forward    | GGCTTGATTGAACCATCTGTA    | 312               |
|                                   |                                               | Reverse    | CTCGGCTGCTGTGCTTTAT      |                   |
| E5, F5                            | <i>TSC1</i> /<br>368T/NT                      | Forward    | CCTCCGAATGTGGACAGTC      | 298               |
|                                   |                                               | Reverse    | CAGACGCTTCTCCCATAGTC     |                   |

The reaction index was served as a unique tag to help the identification of the corresponding DNA gel photo in Supplementary Figure 2 and 3.
